# Supplementary material
Source: HighWire-hosted journal article supplement (https://erj.ersjournals.com/content/58/4/2004633)

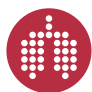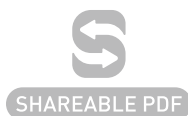

# Neurohormonal modulation in pulmonary arterial hypertension

Eva L. Peters <sup>1,2</sup>, Harm Jan Bogaard<sup>1</sup>, Anton Vonk Noordegraaf <sup>1</sup> and Frances S. de Man<sup>1</sup>

<sup>1</sup>Dept of Pulmonology, Amsterdam UMC, Amsterdam, The Netherlands. <sup>2</sup>Dept of Physiology, Amsterdam UMC, Amsterdam, The Netherlands.

Corresponding author: Frances S. de Man ([fs.deman@amsterdamumc.nl](mailto:fs.deman@amsterdamumc.nl))

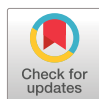

Shareable abstract (@ERSpublications)

**Better insight into neurohormonal changes throughout the development of pulmonary arterial hypertension and associated right heart failure is needed to allow efficacious intervention** <http://bit.ly/2NCV0nO>

**Cite this article as:** Peters EL, Bogaard HJ, Vonk Noordegraaf A, *et al.* Neurohormonal modulation in pulmonary arterial hypertension. *Eur Respir J* 2021; 58: 2004633 [DOI: 10.1183/13993003.04633-2020].

This single-page version can be shared freely online.

Copyright ©The authors 2021.

This version is distributed under the terms of the Creative Commons Attribution Non-Commercial Licence 4.0. For commercial reproduction rights and permissions contact [permissions@ersnet.org](mailto:permissions@ersnet.org)

Received: 24 Dec 2020  
Accepted: 13 March 2021

## Abstract

Pulmonary hypertension is a fatal condition of elevated pulmonary pressures, complicated by right heart failure. Pulmonary hypertension appears in various forms; one of those is pulmonary arterial hypertension (PAH) and is particularly characterised by progressive remodelling and obstruction of the smaller pulmonary vessels. Neurohormonal imbalance in PAH patients is associated with worse prognosis and survival. In this back-to-basics article on neurohormonal modulation in PAH, we provide an overview of the pharmacological and nonpharmacological strategies that have been tested pre-clinically and clinically. The benefit of neurohormonal modulation strategies in PAH patients has been limited by lack of insight into how the neurohormonal system is changed throughout the disease and difficulties in translation from animal models to human trials. We propose that longitudinal and individual assessments of neurohormonal status are required to improve the timing and specificity of neurohormonal modulation strategies. Ongoing developments in imaging techniques such as positron emission tomography may become helpful to determine neurohormonal status in PAH patients in different disease stages and optimise individual treatment responses.

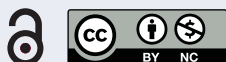

Supplement: inline-supplementary-material-1 [file inline-supplementary-material-1.pdf]
